# Supplementary material
Source: PubMed Central journal article supplement (PMC3972768)
Supplement: NIHMS563632-supplement-Supplementary_materials.pdf [file NIHMS563632-supplement-Supplementary_materials.pdf]

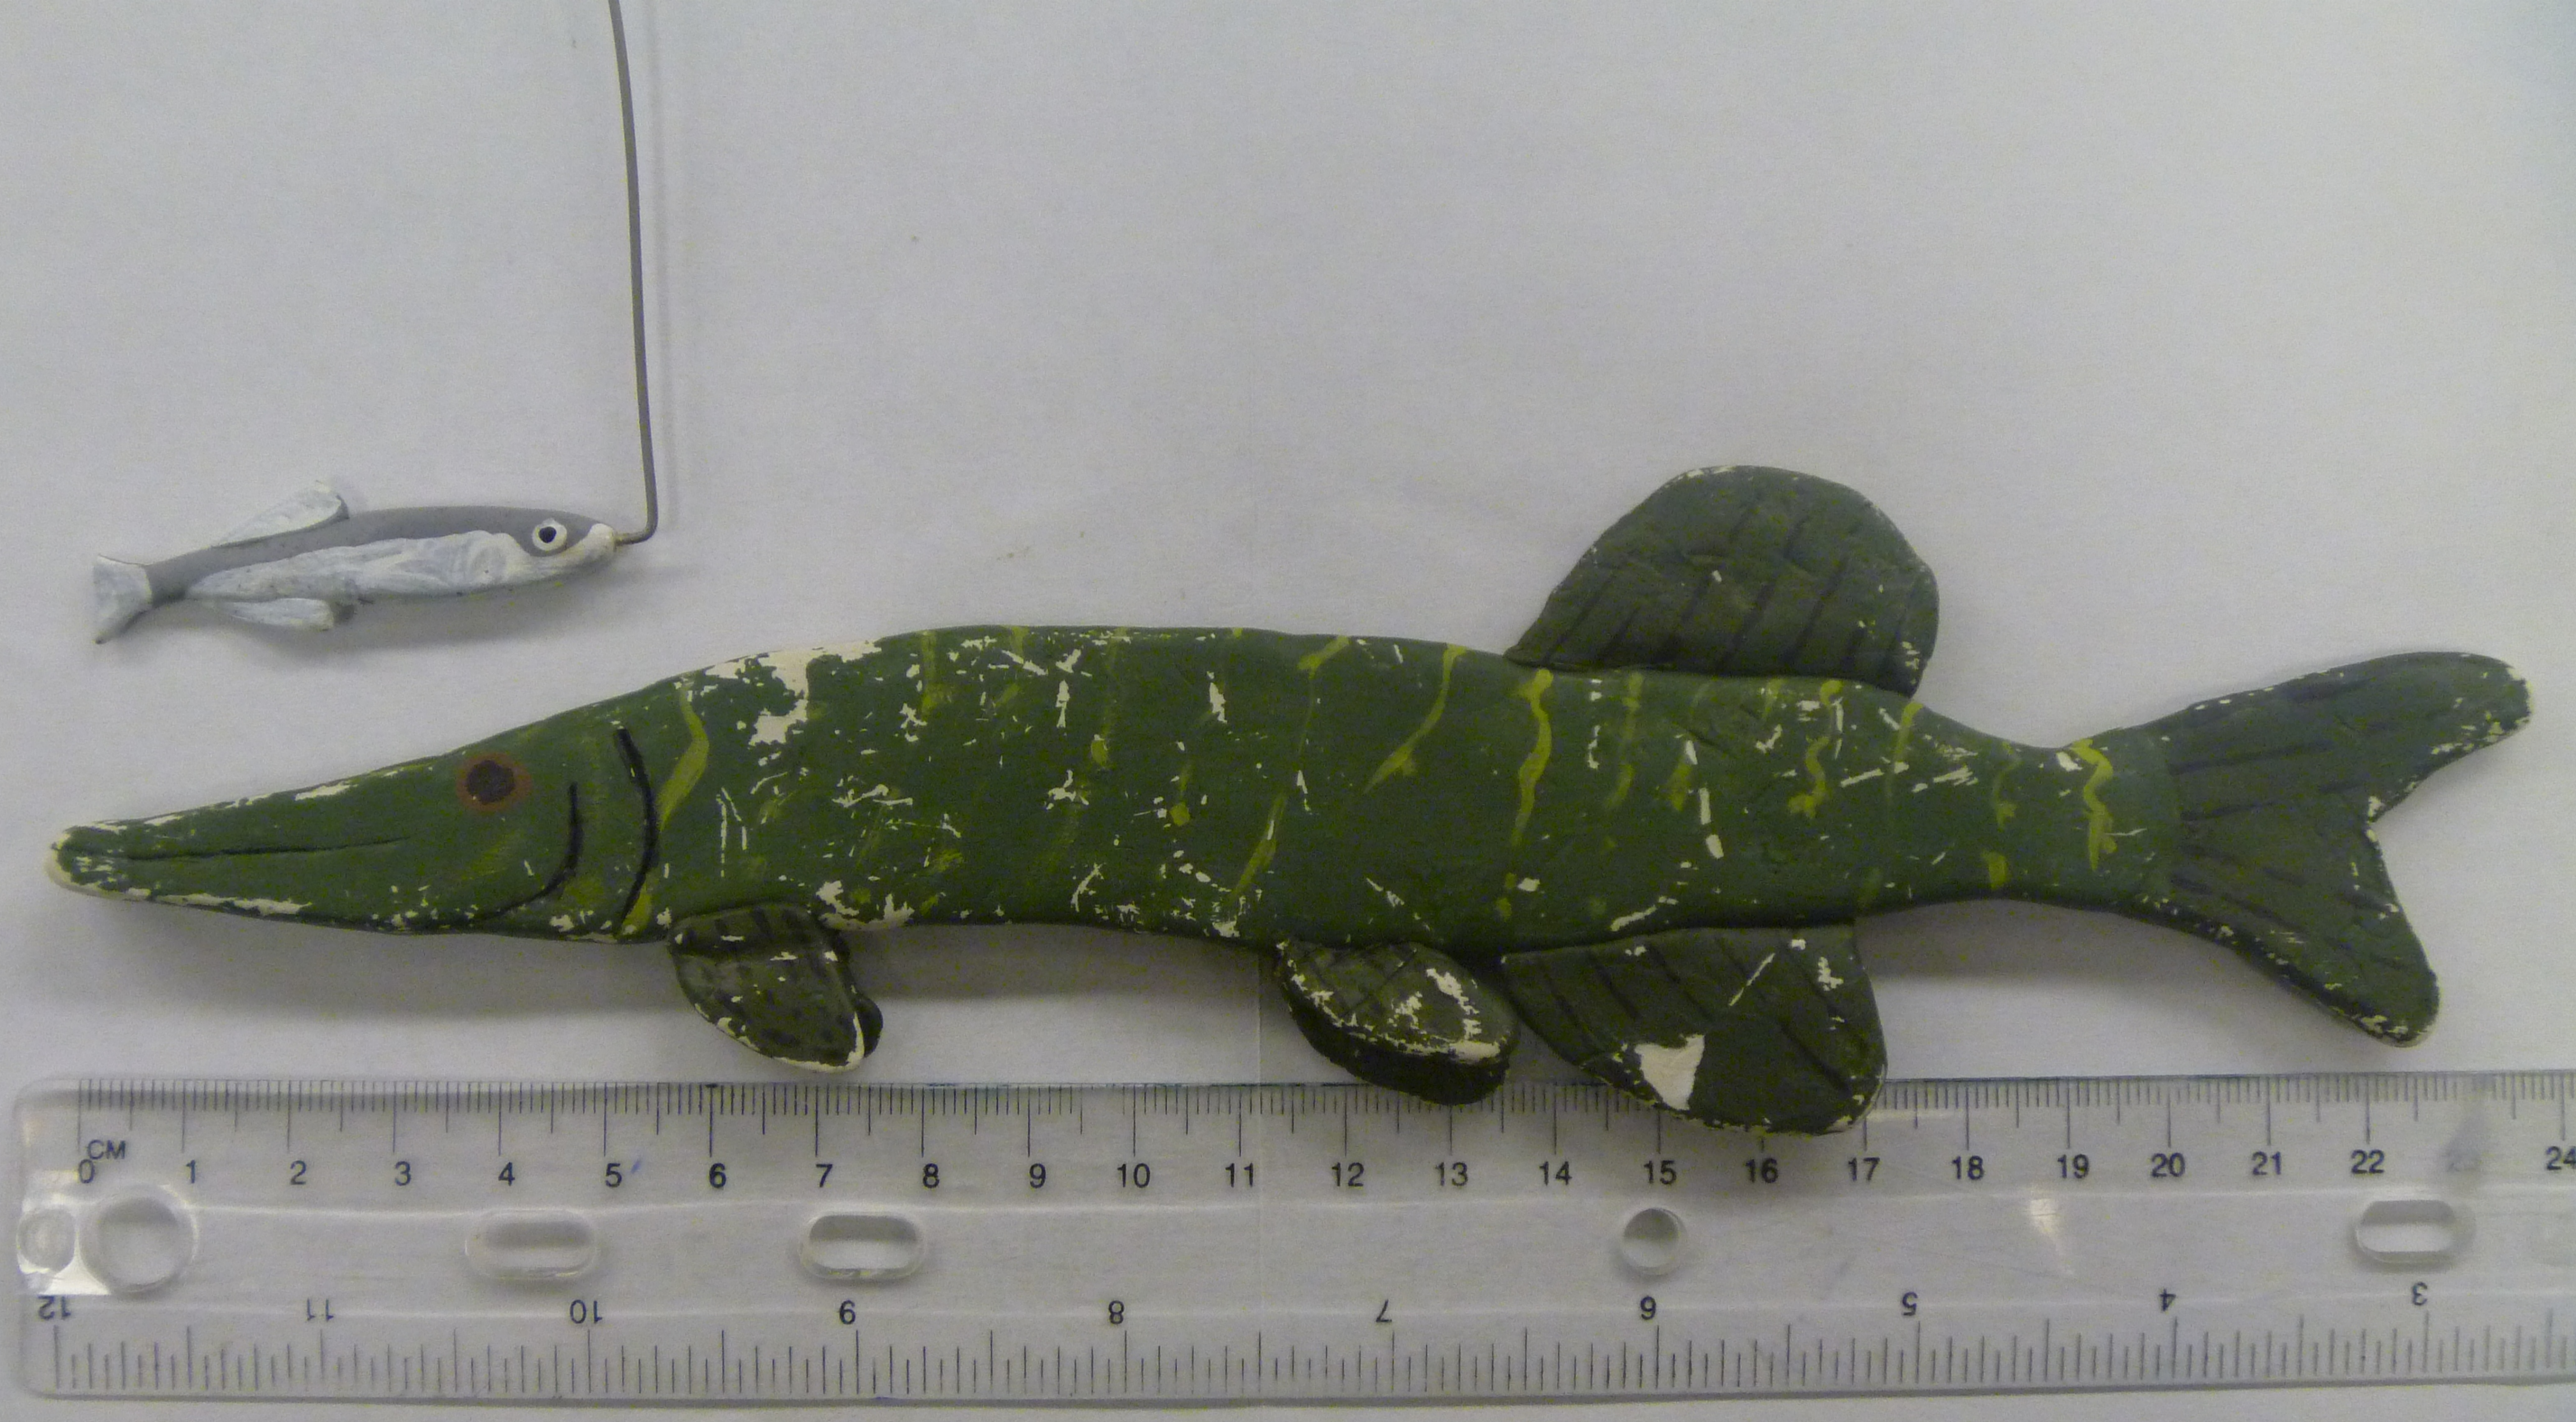

**Figure S1.** A model stickleback and a model pike. The model school consisted of six model sticklebacks.

**Table S1**

Raw (nontransformed) values of all behavioural variables

| Behaviour                                        | Mean   | SE    | Range         |
|--------------------------------------------------|--------|-------|---------------|
| <b>Experiment 1</b>                              |        |       |               |
| Schooling (s)                                    | 95.88  | 22.95 | 0–543.88      |
| Latency to school (s)                            | 129.64 | 14.61 | 0–300         |
| Proportion of time spent schooling in the middle | 23.91  | 2.75  | 0–67.33       |
| <b>Experiment 2</b>                              |        |       |               |
| Number of freezes                                | 11.68  | 1.35  | 2–22          |
| Number of orients to stimulus                    | 5.37   | 0.78  | 0–11          |
| Time with stimulus (s)                           | 2.22   | 1.01  | 0–13.65       |
| Time frozen (s)                                  | 228.52 | 18.44 | 104.28–355.64 |
| Time hidden in refuge (s)                        | 128.48 | 23.78 | 0–317.75      |

Values are for both treatments ('previous experience' and 'immediate exposure') combined.

**Video S1.** A stickleback schooling with the model school. Assay adapted from Wark et al. (2011).

## References

**Wark, A. R., Greenwood, A. K., Taylor, E. M., Yoshida, K. & Peichel, C. L.** 2011. Heritable differences in schooling behavior among threespine stickleback populations revealed by a novel assay. *PLoS One*, **6**, e18316. doi:10.1371/journal.pone.0018316.
